# Supplementary material
Source: Springer Nature journal article supplement (https://www.springermedizin.de/resource/supplementary/13075_2004_1337_MOESM5_ESM.pdf/9689546)

**Figure 3 Longitudinal clinical and serological parameters of a male SLE patient**

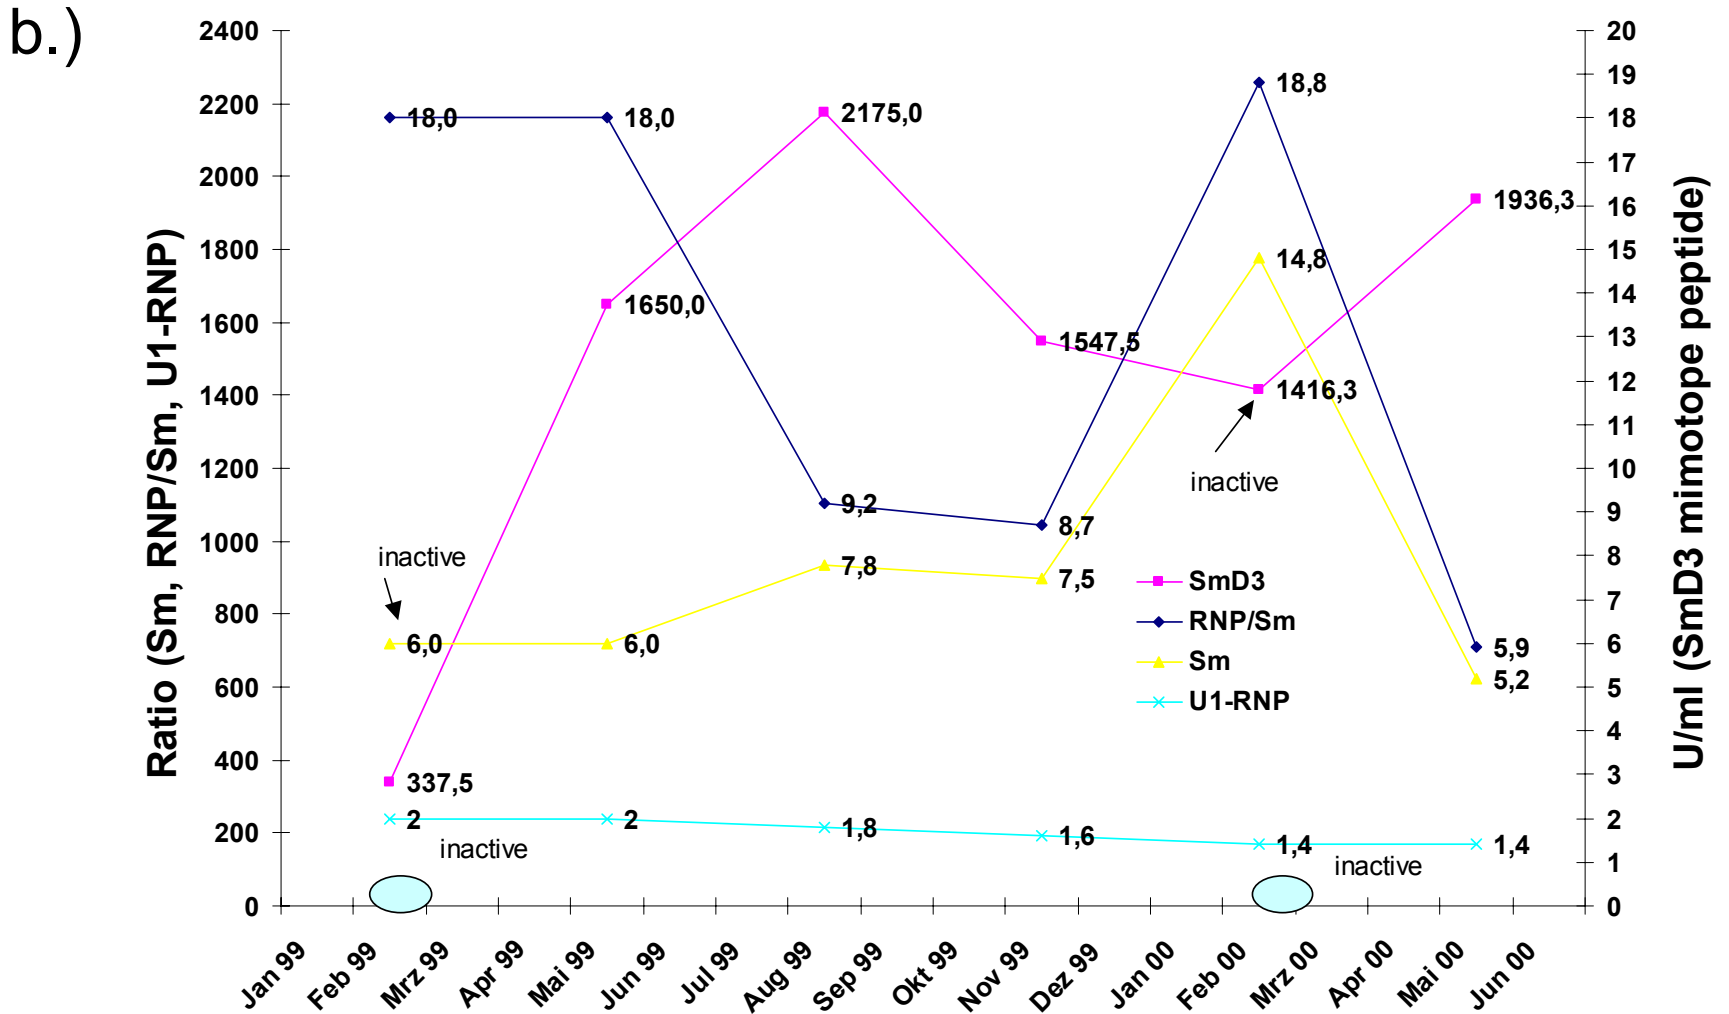

Supplement: MOESM5 [file 9689546]
